# Supplementary material for: Evaluation of the appropriateness of using glucometers for measuring the blood glucose levels in mice
Source: PubMed Central journal article supplement (PMC4858715; doi:10.1038/srep25465), 2016-05-06
Supplement: srep25465-s1.pdf [file srep25465-s1.pdf]

## **Supplementary Information:**

**Supplementary Figures S1-S6**

### **Evaluation of the appropriateness of using glucometers for measuring the blood glucose levels in mice**

Yu Togashi, Jun Shirakawa, Tomoko Okuyama, Shunsuke Yamazaki, Mayu Kyohara,

Ayumi Miyazawa, Takafumi Suzuki, Mari Hamada, and Yasuo Terauchi

## Supplementary Fig. S1

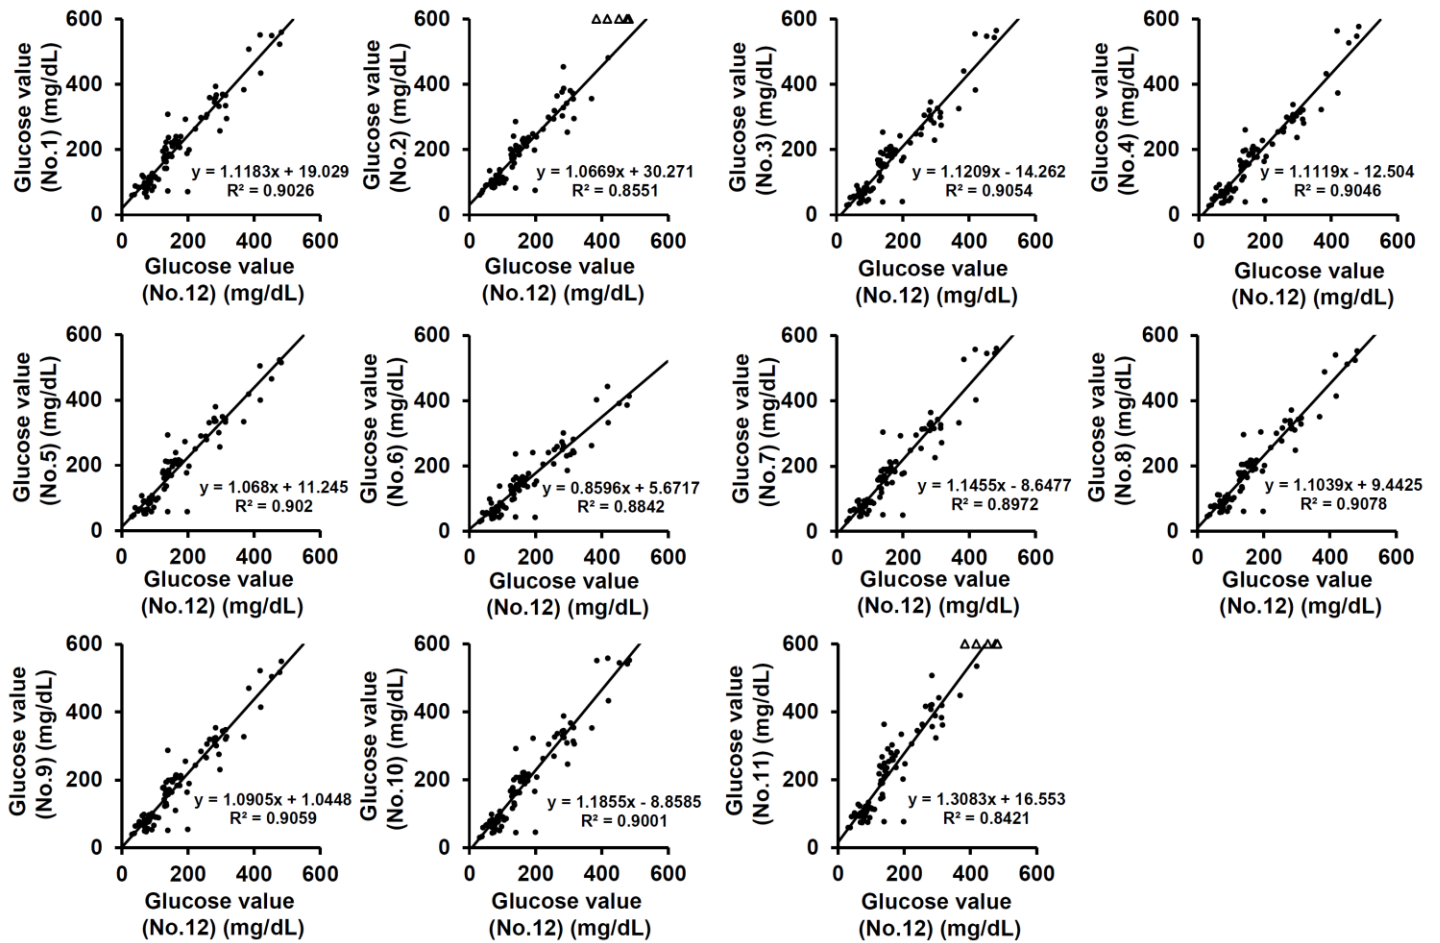

**Supplementary Fig. S1. Regression lines of the glucose concentrations measured by the glucometers (No. 1 to 11) vs. the plasma glucose concentrations measured by a laboratory method (No. 12) in blood samples obtained by retro-orbital puncture.**

Scatter plot and regression lines of measurements by each glucometer (No.1 to 11) vs. plasma glucose levels measured in the laboratory by the mutarotase GOD method (No.12) in retro-orbital venous blood samples (N = 58). Solid circles indicate samples within the measurement limits of the glucometer. Open angles indicate samples showing values over the limit of detection of the glucometers.

## Supplementary Fig. S2

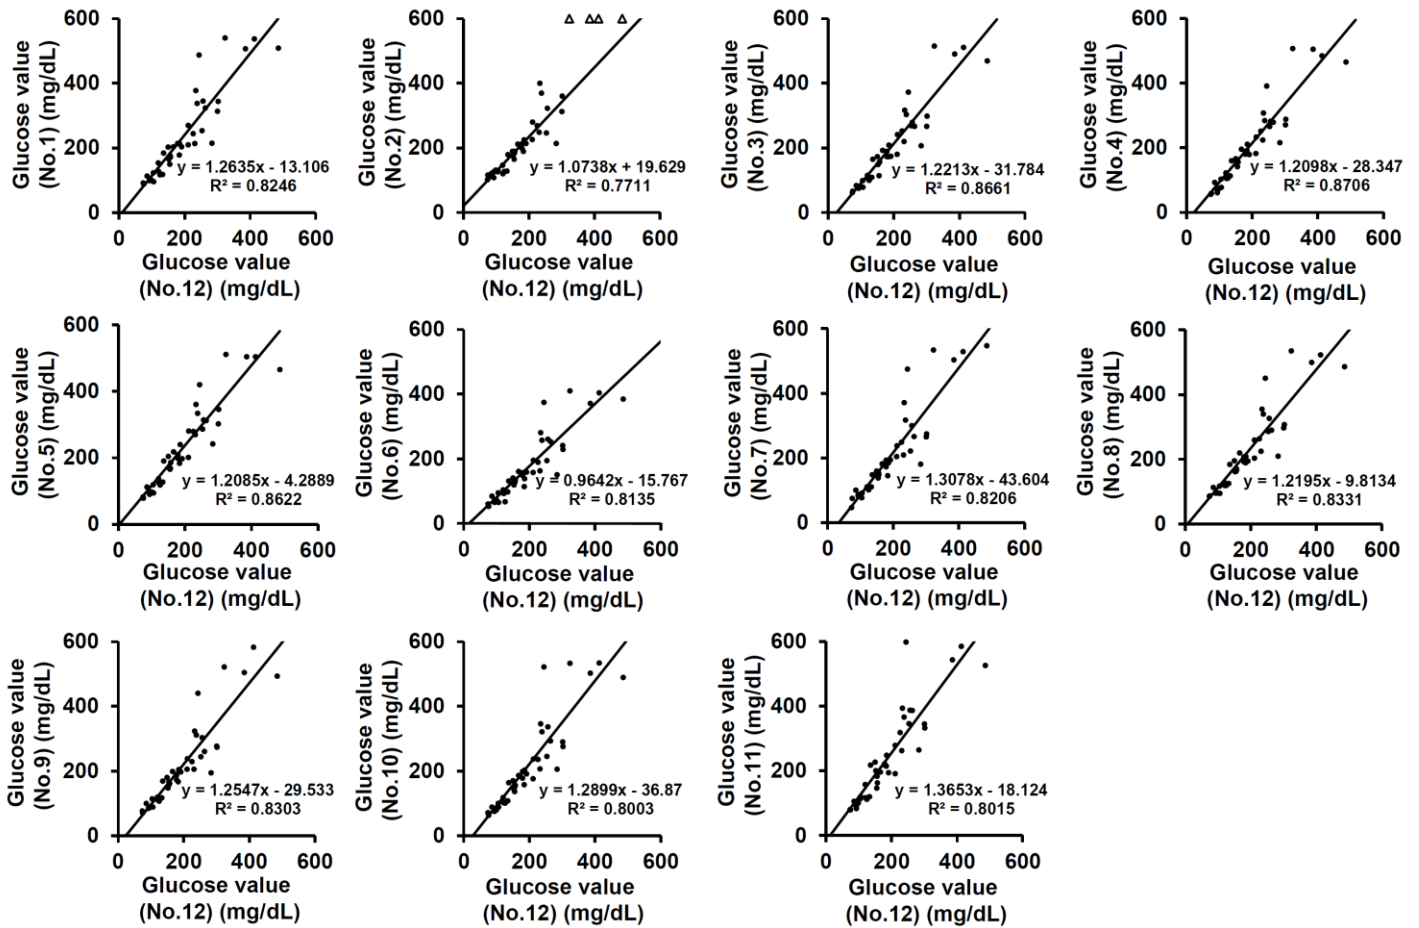

**Supplementary Fig. S2. Regression lines of the glucose concentrations measured by the glucometers (No. 1 to 11) vs. the plasma glucose concentrations measured by a laboratory method (No. 12) in blood samples obtained by tail-tip amputation.**

Scatter plot and regression lines of measurements by each glucometer (No.1 to 11) vs. plasma glucose levels measured in the laboratory by the mutarotase GOD method (No.12) in tail-tip blood samples (N = 40). Solid circles indicate samples within the measurement limits of the glucometer. Open angles indicate samples showing values over the limit of detection of the glucometers.

## Supplementary Fig. S3

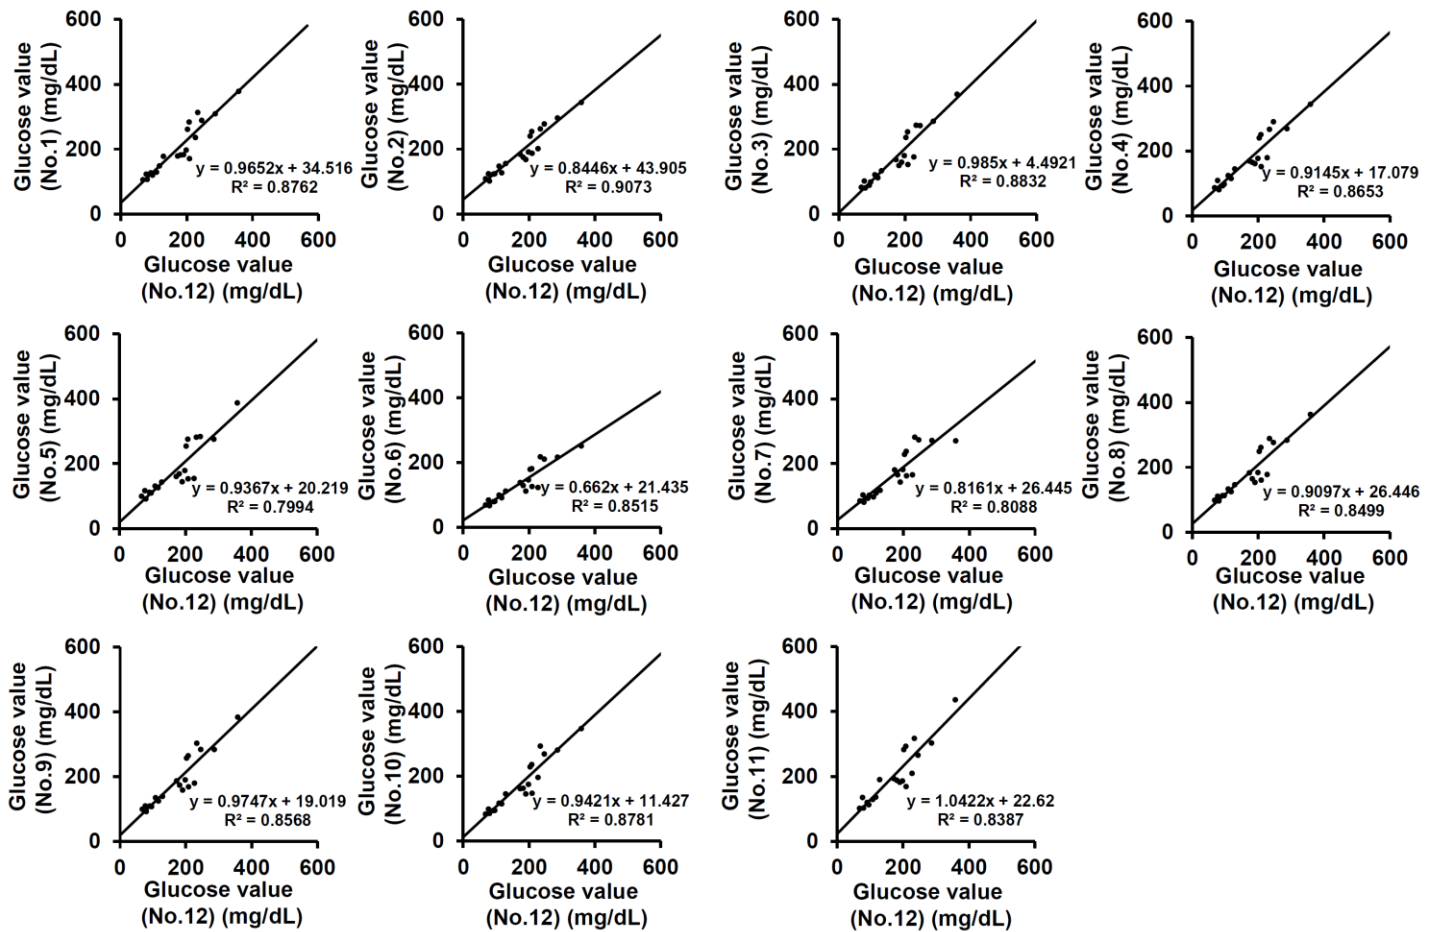

**Supplementary Fig. S3. Regression lines of the glucose concentrations in tail-tip blood measured by the glucometers (No. 1-11) vs. the plasma glucose concentrations in jugular-vein samples measured by a laboratory method (No.12).**

Scatter plot and regression lines of measurements by each glucometer (No.1 to 11) in tail-tip blood samples vs. plasma glucose levels measured in the laboratory by the mutarotase GOD method (No.12) in jugular-vein blood samples (N = 20).

## Supplementary Fig. S4

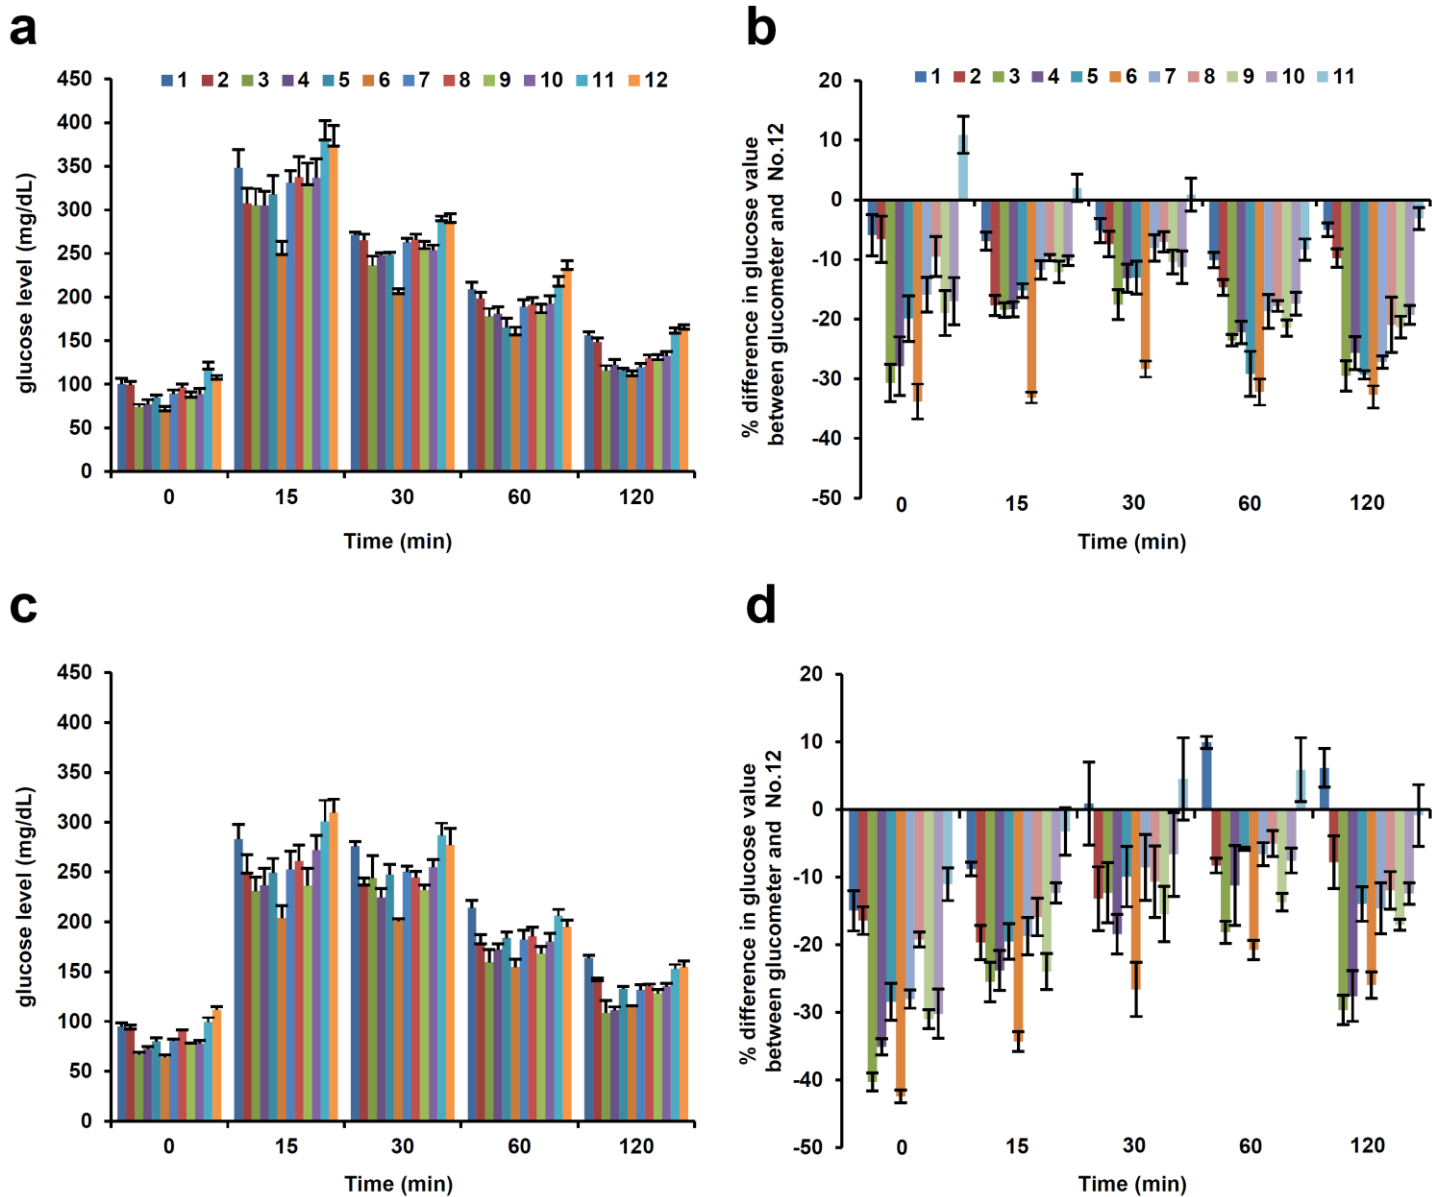

### Supplementary Fig. S4. Comparison of the glucose concentrations measured by the glucometers (No. 1 to 11) and the plasma glucose concentrations measured by a laboratory method (No. 12) during OGTT.

Mice were fasted for 18h, and were orally loaded with glucose (1.5 mg/g body weight). Blood samples were collected before (0 min) and 15, 30, 60, 120 min after loading.

Glucose concentrations measured by the glucometers (No. 1 to 11) and the plasma glucose concentrations measured by a laboratory method were compared at each time point.

(a, b) Blood samples by retro-orbital vessel puncture (N=4-5), and (c, d) Blood samples by tail-tip amputation (N=3-5). Values are the means  $\pm$  SE.

## Supplementary Fig. S5

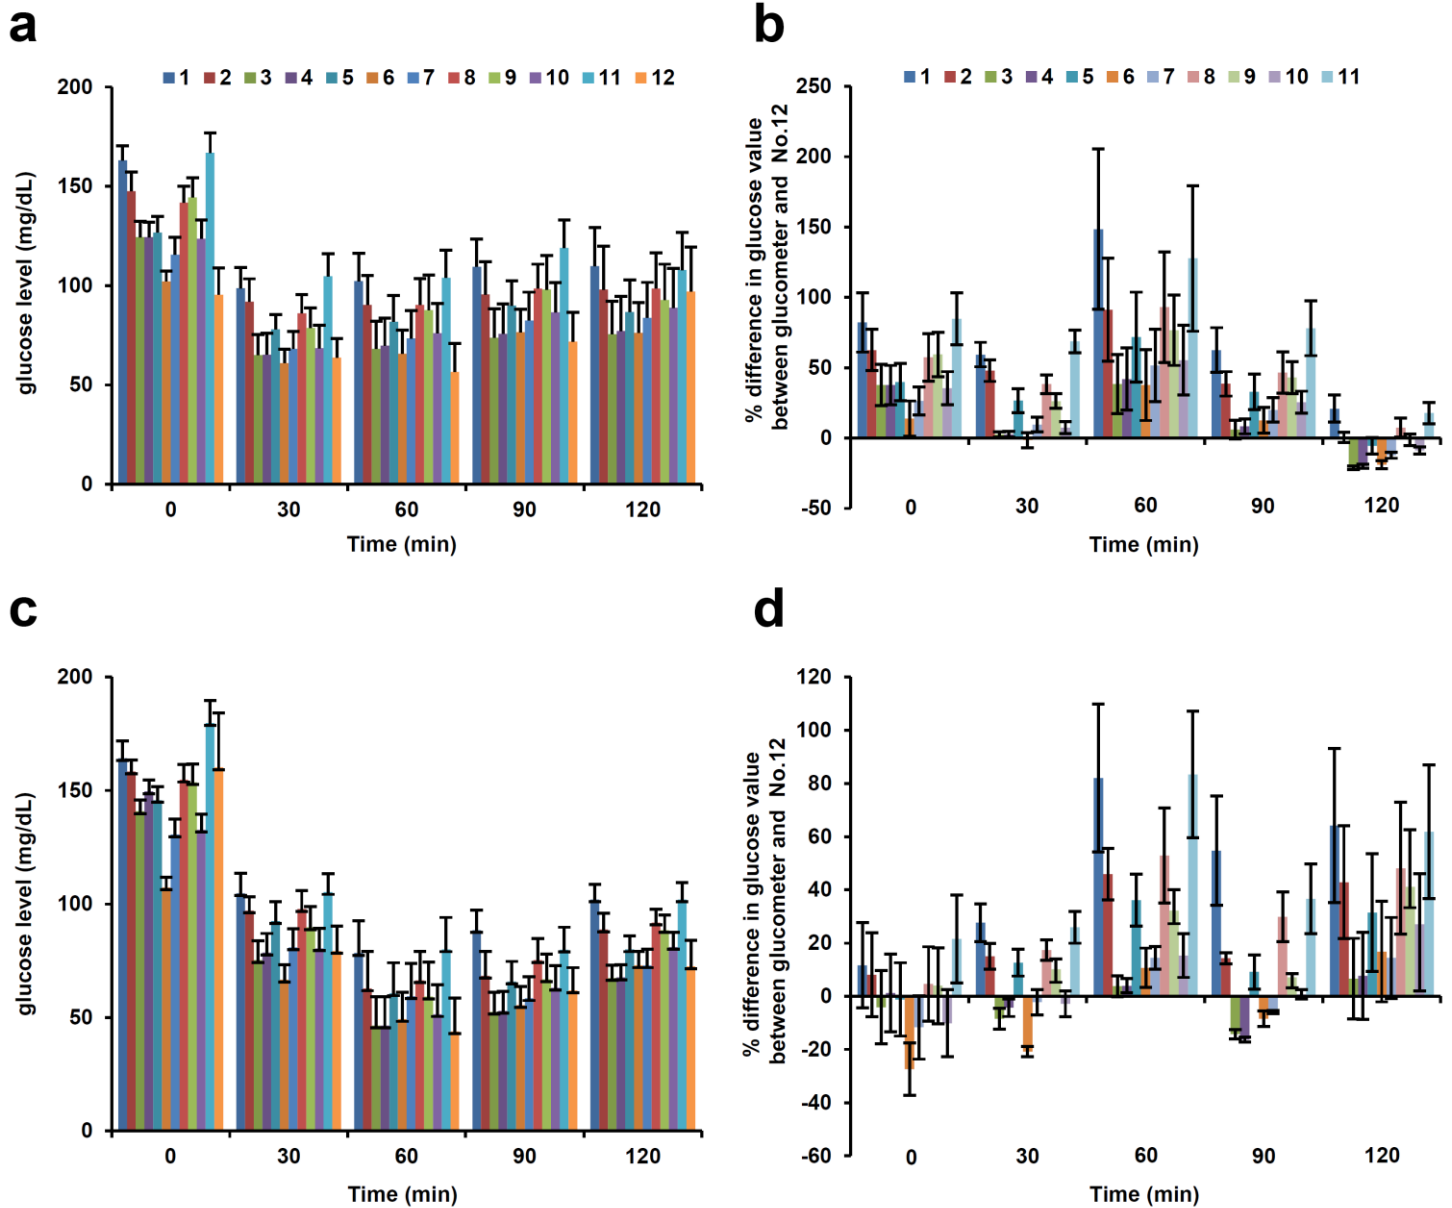

**Supplementary Fig. S5. Comparison of the glucose concentrations measured by the glucometers (No. 1 to 11) and the plasma glucose concentrations measured by a laboratory method (No.12) during ITT.**

Mice were fasted for 2h, and were intraperitoneally injected with human insulin (0.75 mU/g body weight). Blood samples were collected before (0 min) and 30, 60, 90, 120 min after injection. Glucose concentrations measured by the glucometers (No. 1 to 11) and the plasma glucose concentrations measured by a laboratory method were compared at each time point. (a, b) Blood samples by retro-orbital vessel puncture (N=4-5), and (c, d) Blood samples by tail-tip amputation (N=5). Values are the means  $\pm$  SE.

## Supplementary Fig. S6

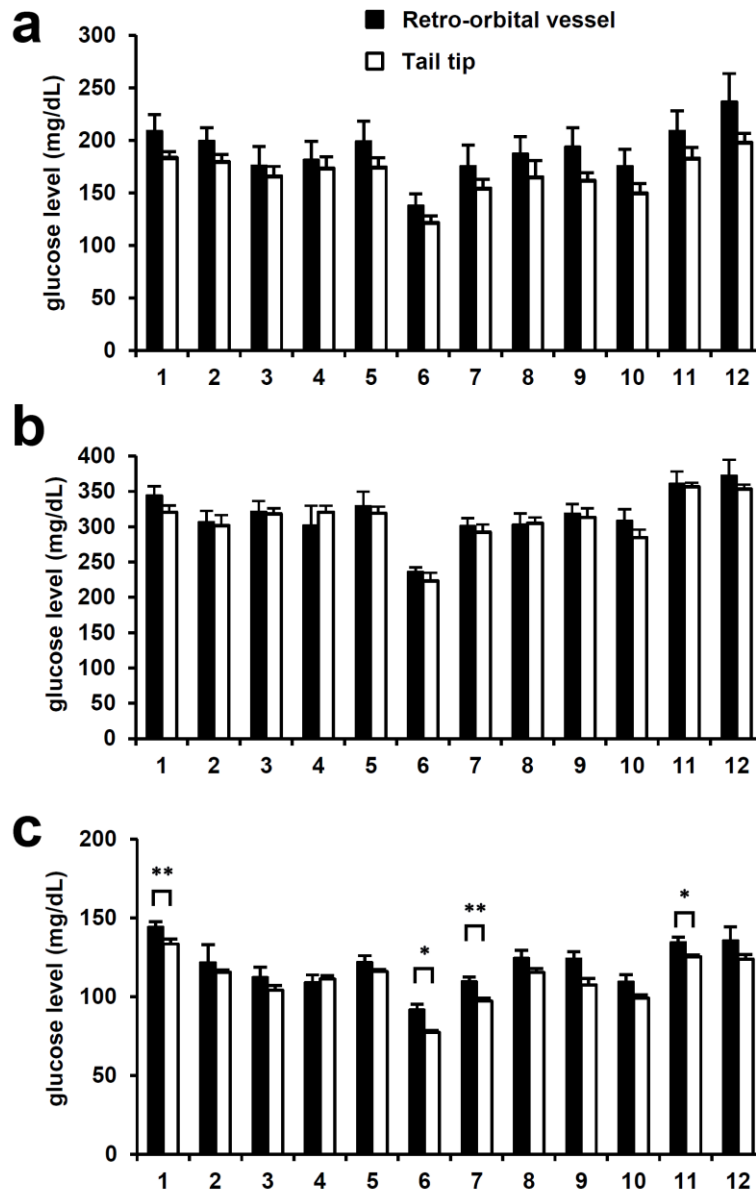

### Supplementary Fig. S6. Comparison of the method used for the blood collection: retro-orbital vessel puncture vs. tail-tip amputation, in reverse sampling order.

Blood samples were obtained by tail-tip amputation just followed by retro-orbital vessel puncture. Plasma glucose levels were measured in the laboratory by the mutarotase GOD method (No. 12), and blood glucose levels were measured by each glucometer (No. 1 to 11). (a) Sampling in the random-fed status (N = 5). (b) Sampling conducted 15 min after oral glucose loading (N = 4). (c) Sampling conducted 30 min after intraperitoneal insulin loading (N = 4). \*P < 0.05. \*\*P < 0.01. Values are the means  $\pm$  SE. Black bars, retro-orbital vessels, White bars, tail-tip.
